## Resources

# bayroot: Bayesian sampling of HIV-1 integration dates by root-to-tip regression

Roux-Cil Ferreira<sup>1</sup>, Emmanuel Wong<sup>1</sup> and Art F. Y. Poon<sup>1,2,3,\*</sup>

<sup>1</sup> Department of Pathology and Laboratory Medicine, Western University, London, ON, Canada.

<sup>2</sup> Department of Microbiology and Immunology, Western University, London, ON, Canada.

<sup>3</sup> Department of Computer Science, Western University, London, ON, Canada.

\* Corresponding author: Dr. Art F Y Poon  
Western University  
Health Sciences Addition, H422  
London, Ontario  
Canada N6A 5C1  
e-mail: [apoon42@uwo.ca](mailto:apoon42@uwo.ca)

## Abstract

The composition of the latent HIV-1 reservoir is shaped by when proviruses integrated into host genomes. These integration dates can be estimated by phylogenetic methods like root-to-top (RTT) regression. However, RTT does not accommodate variation in the number of substitutions over time, uncertainty in estimating the molecular clock or the position of the root in the tree. To address these limitations, we implemented a Bayesian extension of RTT as an R package (*bayroot*), which enables the user to incorporate prior information about the time of infection and start of antiretroviral therapy. Taking an unrooted maximum likelihood tree as input, we use a Metropolis-Hastings algorithm to sample three parameters (the molecular clock, the location of the root, and the time associated with the root) from the posterior distribution. Next, we apply rejection sampling to this posterior sample of model parameters to simulate integration dates for HIV proviral sequences. To validate this method, we use the R package *treeswithintrees* to simulate time-scaled trees relating samples of actively- and latently-infected T cells from a single host. We find that *bayroot* yields

16 significantly more accurate estimates of integration dates than conventional RTT under  
17 a range of model settings.

## 18 **1. Introduction**

19 Root-to-tip (RTT) regression is a simple method to locate the earliest point in time in a phylogenetic  
20 tree (*i.e.*, rooting the tree; Huelsenbeck et al., 2002), to measure the rate of evolution (Drummond  
21 et al., 2003), or to reconstruct the divergence times of common ancestors. This method assumes  
22 the existence of a strict molecular clock, *i.e.*, the rate at which mutations accumulate is roughly  
23 constant over time (Bromham and Penny, 2003). Accordingly, the number of mutations should in-  
24 crease linearly over time. Hence, this method is a linear regression of the evolutionary divergence  
25 of sequences from their common ancestor against the times when those sequences were observed.  
26 The primary input of RTT regression is an unrooted phylogenetic tree with branch lengths mea-  
27 sured in units of evolutionary time (*i.e.*, the expected number of substitutions per site; Tajima and  
28 Nei, 1984), which is the standard output of maximum likelihood methods for reconstructing phy-  
29 logenies. The tips of the tree representing observed sequences are labelled with sampling times.  
30 Thus, RTT becomes an optimization over three parameters: the location of the root in the tree, the  
31 time associated with the root ( $x$ -intercept), and the molecular clock (slope of regression).

32 RTT has a broad range of applications. Since many viruses have a very rapid rate of evolution,  
33 RTT can be applied to sequences collected over a number of months or years. For instance, RTT  
34 has recently been used to estimate the origin date and clock rate of SARS-CoV-2 within the first  
35 few months of the pandemic (Duchene et al., 2020). We are particularly interested in the use  
36 of RTT to estimate the integration dates of HIV-1 proviruses within hosts (Jones et al., 2018).  
37 HIV-1 converts its RNA genome into double-stranded DNA that becomes integrated into the host  
38 genome as part of the virus replication cycle. In some cases, this integrated provirus becomes  
39 reversibly dormant in a transcriptionally-inactive host cell (Siliciano and Siliciano, 2004). This  
40 long-lived reservoir of latently-infected cells is the primary obstacle to an effective cure for HIV-1.  
41 Consequently, characterizing the composition and dynamics of the latent reservoir has significant

42 implications for HIV-1 cure research (*e.g.*, Gondim et al., 2021).

43 For instance, we can estimate the molecular clock (the slope of the regression) from longitu-  
44 dinal samples of plasma HIV-1 RNA sequences before the start of antiretroviral therapy (ART). If  
45 we reconstruct a tree relating both these RNA sequences and proviral sequences from the latent  
46 reservoir, we can then use our clock estimate to extrapolate integration dates for the latter (Jones  
47 et al., 2018). This relies on the assumption that the integrated HIV-1 genome ceases to accumulate  
48 mutations upon integrating into the host genome. Due to its simplicity, RTT has a number of signif-  
49 icant limitations. It implicitly assumes that the input tree is known without error. In addition, RTT  
50 methods generally yield a single ‘point estimate’ of model parameters by minimizing some cost  
51 function (Drummond et al., 2003; To et al., 2016). Mapping proviral sequences to the regression  
52 line yields one and only one estimate of the integration date. However, variation in the number of  
53 mutations after a given amount of time is expected, even under a strict molecular clock (Langley  
54 and Fitch, 1974). A proviral sequence may, by chance, carry more mutations than expected given  
55 its actual date of integration. This can cause RTT to project a sequence’s integration date estimate  
56 into the future, past its time of sampling or even past the start of ART, when the infection of new  
57 cells should be completely suppressed.

58 Here we describe a Bayesian extension of the RTT method to estimate HIV-1 integration dates.  
59 Adopting a Bayesian approach provides a means of quantifying our uncertainty in estimating inte-  
60 gration dates, as well as incorporating prior information about the time of infection and the start of  
61 ART. We detail our implementation of this method as an R package called *bayroot*, and use a simu-  
62 lation model of within-host population dynamics to validate *bayroot* in comparison to conventional  
63 RTT.

## 64 **2. Methods**

65 **Regression model.** We start with an unrooted tree  $T$  relating  $n$  observed sequences. A strict  
66 molecular clock assumes that mutations accumulate at a constant rate  $\mu$  over time, such that the  
67 number of mutations per unit time follows a Poisson distribution. Let  $Y_i$  be the number of mutations

68 in the  $i^{\text{th}}$  observed sequence, which is determined by the location of the root in  $T$ . Since  $Y_i$  is an  
69 integer-valued outcome, we must rescale the input tree  $T$  by multiplying its branch lengths by the  
70 sequence length, such that lengths are in units of the expected number of substitutions per genome.  
71 Let  $t_0$  be the origin time associated with the root. Let  $\Delta t_i$  be the time that has elapsed between the  
72  $i^{\text{th}}$  sample and the root. The log-likelihood for a set of RNA sequences  $\{Y_i, \Delta t_i\}$  is:

$$\log L(Y_i, \Delta t_i) = \sum_i Y_i \log(\mu \Delta t_i) - \mu \Delta t_i - \log \Gamma(Y_i + 1) \quad (1)$$

73 where  $\Gamma(x)$  is the gamma function. Equation (1) is sometimes referred to as the Langley-Fitch  
74 model (Langley and Fitch, 1974).

75 We assume a uniform prior distribution for possible locations of the root over the entire length  
76 of the tree. We also assume a uniform prior distribution for  $t_0$ . If a seroconversion window, *i.e.*,  
77 the time interval between the last HIV seronegative visit and the first seropositive visit, is available  
78 for the host individual, these visit dates can be used to set lower and upper bounds for the uniform  
79 prior. Finally, we assume a lognormal prior distribution on the clock rate  $\mu$ , which can be informed  
80 by previous measurements of HIV-1 substitution rates within hosts (*e.g.*, Alizon and Fraser, 2013).

81 With these prior distributions and the model likelihood, we implemented a Metropolis-Hastings  
82 sampling algorithm in R. A proposal function shifts the root along a branch by some distance  $\delta$ ,  
83 selecting a branch at random if it encounters an internal node, *i.e.*, split, as it traverses the length  
84 of the tree. If, however, a terminal node is encountered before the root has been shifted by distance  
85  $\delta$ , then the remaining distance is traveled by reflecting back from this terminus. This results in  
86 a symmetric proposal distribution. We also used a uniform proposal  $\mu' \sim \text{Unif}(\mu - \delta, \mu + \delta)$  for  
87 the clock rate, and a truncated normal proposal  $t'_0 \sim N(t_0, \sigma)$  for the origin time. The sampling  
88 algorithm returns an S3 object storing a data frame of sampled parameter values and a character  
89 vector of sampled trees serialized into Newick strings.

90 **Sampling integration dates.** Given a posterior sample of parameters  $Y$ ,  $\mu$  and  $t_0$ , we need to  
91 propagate this information to the distribution of integration times associated with DNA sequences

92 sampled post-ART initiation. Using Bayes' rule, the probability of integration time  $t_j$  for the  $j^{\text{th}}$   
93 HIV-1 DNA sequence given divergence  $Y_j$  is:

$$P(t_j|Y_j) = \frac{P(Y_j|t_j)P(t_j)}{P(Y_j)} \quad (2)$$

94 where we index by  $j$  instead of  $i$  to emphasize a shift from RNA to DNA sequences. We assume  
95 a uniform prior for integration times,  $P(t_j) = (T - t_0)^{-1}$ , where  $t_0$  is the origin date and  $T$  is the  
96 time of ART initiation. Substituting equation 1 and setting  $s = t - t_0$ , we solve the integral  $P(Y_j)$   
97 in the denominator as:

$$P(Y_j) = \frac{\int_0^{T-t_0} (\mu s)^{Y_j} \exp(-\mu s) ds}{(T - t_0)\Gamma(Y_j + 1)} = \frac{\gamma(Y_j + 1, \mu(T - t_0))}{\mu(T - t_0)\Gamma(Y_j + 1)} \quad (3)$$

98 where  $\gamma(a, x)$  is the lower incomplete gamma function,  $\int_0^x t^{a-1} \exp(-t) dt$ . Finally, substituting  
99 equations (1) and (3) into (2) and letting  $\Lambda = \mu(T - t_0)$ , we can write:

$$P(t_j|Y_j) = \frac{\mu \Lambda^{Y_j} \exp(-\Lambda)}{\gamma(Y_j + 1, \Lambda)} \quad (4)$$

100 To generate a sample of integration dates, we use a simple rejection sampling method. For a given  
101 posterior sample of  $Y_j$ ,  $\mu$  and  $t_0$ , we use Brent optimization to locate the maximum of Equation  
102 (4), initialized at the midpoint  $t = t_0 + (T - t_0)/2$ . This maximum was used as an upper bound for  
103 rejection sampling for values of  $t \sim \text{Unif}(t_0, T)$ .

104 The Bayesian regression and integration date sampling methods described above were imple-  
105 mented in R as a package called *bayroot*. All source code is publicly available under the MIT  
106 license at <https://github.com/PoonLab/bayroot>.

107 **Simulating data.** To validate the above method, we used the R package *twt* ('trees within trees',  
108 <https://github.com/PoonLab/twt>) to simulate cell population dynamics forward in time, and then  
109 to simulate trees by sampling lineages backwards in time to their common ancestors. This pack-  
110 age uses the exact stochastic simulation of discrete events (Gillespie, 1977). In brief, it calculates  
111 the total rate of all events ( $\Lambda$ ), draws an exponentially distributed waiting time to the first event

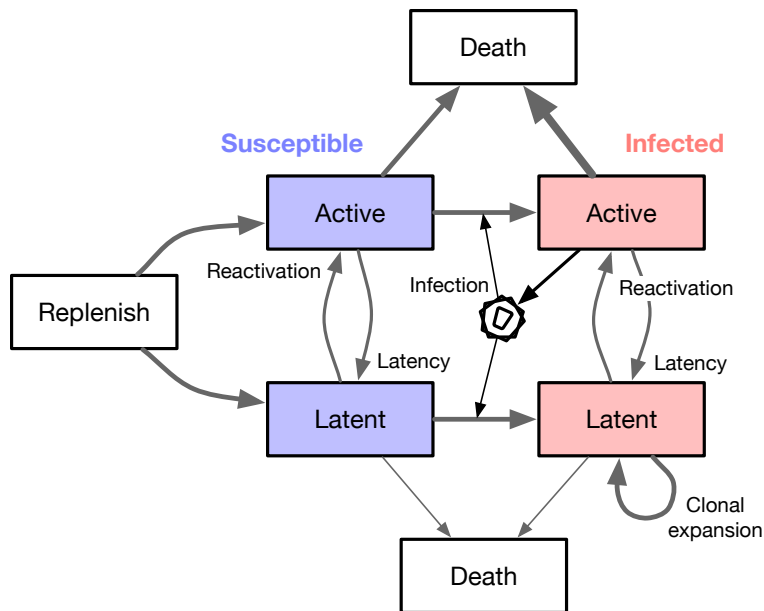

Figure 1: A schematic diagram of the compartmental model used to simulate cell population dynamics. Each box represents a well-mixed population of cells sharing the same rate parameters. We assume that only actively-infected cells release virus particles that go on to infect other, susceptible cells.

112  $\tau \sim \exp(-\Lambda)$ , and then draws a uniform random number to determine which event occurs. We im-  
 113 plemented a compartmental model of cell population dynamics (Figure 1) that can be represented  
 114 by the following set of differential equations:

$$\begin{aligned}
 \frac{dT}{dt} &= -\rho T \\
 \frac{dA_S}{dt} &= \rho k T + m_{LA} L_S - \lambda_{AA}(t) A_I A_S - m_{AL} A_S - \mu_{A_S} A_S \\
 \frac{dA_I}{dt} &= \lambda_{AA}(t) A_I A_S + m_{LA} L_I - m_{AL} A_I - \mu_{A_I} A_I \\
 \frac{dL_S}{dt} &= r(1-k)T + m_{AL} A_S - \lambda_{AL}(t) A_I L_S - \lambda_{LL} L_I L_S - m_{LA} L_S - \mu_{L_S} L_S \\
 \frac{dL_I}{dt} &= \lambda_{AL}(t) A_I L_S + \lambda_{LL} L_I L_S + m_{AL} A_I - m_{LA} L_I - \mu_{L_I} L_I
 \end{aligned} \tag{5}$$

115 This model is a simplified version of the system described by Rong and Perelson (2009). Most  
 116 notably, our version does not model changes in the viral load.  $T$  represents a finite population  
 117 of naive CD4+ T cells from which the populations of active ( $A$ ) and resting (latent,  $L$ ) cells are

118 replenished at rates  $k\rho$  and  $(1 - k)\rho$ , respectively, for  $0 \leq k \leq 1$ . The  $S$  and  $I$  subscripts denote  
 119 susceptible and infected subpopulations of active and latent cells. A branching event ( $\lambda_{xy}$ ) requires  
 120 a source cell to induce a target cell to undergo a change of state (switch compartments from  $x$  to  $y$ ).  
 121 For example,  $\lambda_{AA}$  represents the infection rate of a susceptible active T cell by a virus released from  
 122 an actively infected cell. We assume that virus replication is completely blocked by the initiation  
 123 of ART at time  $t^*$ , such that  $\lambda_{A\bullet}(t \geq t^*) = 0$ . A transition event occurs when a cell spontaneously  
 124 migrates from compartments  $x$  to  $y$  at rate  $m_{xy}$ . For example,  $m_{LA}$  represents the reactivation rate  
 125 of a latent cell. Lastly, we assume constant cell death rates  $\mu_x$  for each compartment  $x$ .

126 The simulation is initialized at time zero with user-specified population sizes of susceptible  
 127 cells in each compartment, and a single actively infected cell,  $A_I(0) = 1$ . We simulated the integer-  
 128 valued population size trajectories  $\{T, A_S, A_I, L_S, L_I\}(t)$  forward in time until a stopping time of  
 129  $t = 20$  simulation time units. We generated 50 replicate sets of trajectories under two different  
 130 scenarios by exact stochastic simulation. The rate parameters were set to the following values:  
 131  $r = 0.02$ ,  $k = 0.5$ ,  $\lambda_{AA}(t < t^*) = 0.002$ ,  $\lambda_{AL}(t < t^*) = 10^{-4}$ ,  $m_{AL} = m_{LA} = 0.001$ ,  $\mu_{A_S} = 0.005$ ,  
 132  $\mu_{A_I} = 0.1$ , and  $\mu_L = 0.001$ . ART was initiated at  $t^* = 10$  time units post-infection in scenario 1,  
 133 and at  $t^* = 15$  in scenario 2. For each iteration of the simulation, we calculated the rates for every  
 134 type of event, adjusted by the respective compartment size at the current time  $t$ . For example, the  
 135 rate of transmissions from  $A_I$  to  $A_S$  was set to  $\lambda_{AA}(t)A_I(t)A_S(t)$ . We drew an exponential waiting  
 136 time given the total rate of all event types:

$$\Lambda(t) = \sum_{x,y} \lambda_{xy}(t)N_x(t)N_y(t) + \sum_{x,y} m_{xy}(t)N_x(t)$$

137 and then determined which event type occurred with probability  $\lambda_{xy}(t)N_x(t)N_y(t)/\Lambda(t)$  or  $m_{xy}(t)$   
 138  $N_x(t)/\Lambda(t)$ . Next, we incremented or decremented the respective population sizes for compart-  
 139 ments affected by the event type. The time, type and compartments of this event is recorded in a  
 140 log that is later used to simulate trees. An example set of population size trajectories simulated  
 141 using this algorithm under scenario 1 is illustrated in Figure 2.

142 To generate a tree relating the sampled lineages in *tw*, we applied another exact stochastic sim-

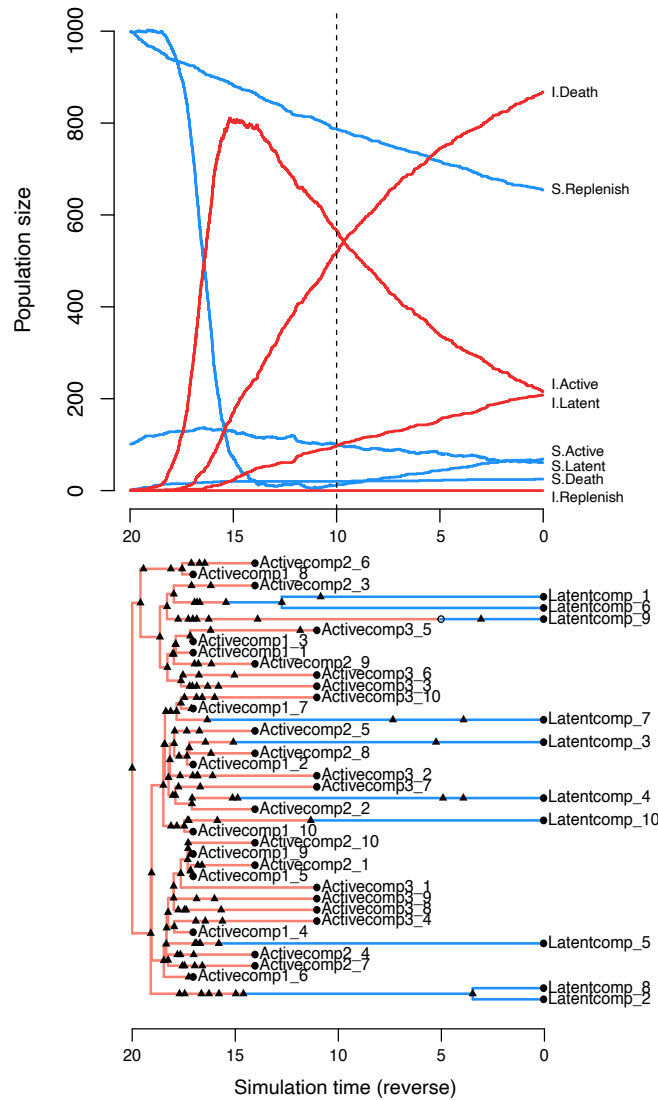

Figure 2: Examples of *twt* simulation outputs for a model of cell dynamics in the latent reservoir. (top) Population dynamics simulated forward in time. Each line represents the population size of a different compartment.  $S$  = susceptible,  $I$  = infected. The dashed vertical line indicates the time of ART initiation. (bottom) A tree simulated in reverse-time, relating 10 cells sampled from the latently-infected compartment at  $\tau = 0$ , and 30 from the actively-infected compartment at  $\tau = 11, 14, 17$  (scenario 1), where  $\tau = 20 - t$ . Triangles represent transmission events, open circles represent transitions, and closed circles represent sampling times. Branches representing cell lineages in a latent state (blue) are collapsed prior to simulating virus evolution.



143 ulation algorithm in reverse time. For the 50 replicate sets of trajectories generated under scenario  
144 1, we sampled 10 HIV-1 RNA lineages at times  $t = 3, 6$  and 9 post-infection. For trajectories gen-  
145 erated under scenario 2, we sampled 10 HIV-1 RNA lineages at  $t = 11, 13$  and 15 post-infection.  
146 In both scenarios, we sampled 10 latently-infected cells at  $t = 20$  post-infection, for a total of 40  
147 sampled lineages per replicate tree. These lineage sampling times defined the initial conditions for  
148 the reverse-time simulation of trees. Next, the algorithm samples events from the log generated  
149 in the forward-time simulation to build up a tree relating the sampled lineages. The stopping con-  
150 dition of the tree sampling algorithm is that the sampled lineages converge to a single common  
151 ancestor, which becomes the root.

152 We modified *twt* to output a Newick serialization of this ‘transmission tree’ among cells, la-  
153 belling tips with sampling times. This tree included internal nodes with only one descendant  
154 branch, representing lineage state transitions, or transmissions to/from an unsampled lineage. In-  
155 ternal nodes were labelled with strings encoding the event type, node states (compartments), and  
156 unique identifiers for the individual cells involved. These annotations enabled us to ‘colour’ the  
157 branches of the tree by lineage state. The true integration dates for sampled latently-infected cells  
158 were recorded to a separate file. An example of a tree generated by this process is shown in Figure  
159 2.

160 To simulate molecular evolution, we collapsed all branches corresponding to latently-infected  
161 cells, and used the resulting tree as input for INDELible (version 1.03; Fletcher and Yang, 2009).  
162 We assigned an HIV-1 *env* sequence at the root (Genbank accession number AY772699). This  
163 sequence is one of the HIV-1 subtype C references curated by the Los Alamos National Laboratory  
164 HIV Sequence Database (<http://www.hiv.lanl.gov>). We configured INDELible to use the Tamura-  
165 Nei (TrN) nucleotide substitution model with transition rates  $\kappa_1 = 4$  and  $\kappa_2 = 8$ , and stationary  
166 base frequencies  $f_A = 0.4$  and  $f_C = f_G = f_T = 0.2$ . In addition, we rescaled the tree such that the  
167 expected number of substitutions per nucleotide site over its entire length was 1. Finally, we used  
168 FastTree (version 2.1.11, compiled for double precision; Price et al., 2010) to reconstruct unrooted  
169 maximum likelihood trees from these simulated alignments.

170 **Model validation.** We ran our Bayesian sampling method on each of the 100 simulated trees for  
171  $2 \times 10^4$  steps, discarding a burn-in of 2,000 steps and thinning the remaining chain down to 1,000  
172 steps. We set the lognormal prior distribution on clock rates to  $\mu = -5$  and  $\sigma = 2$ , and the uniform  
173 prior distribution on root dates to a minimum of one simulation time unit before the true origin,  
174 and a maximum of the first HIV RNA sampling time. In addition, we set the proposal parameters  
175 to  $\delta = 0.01$  for the root location,  $\sigma = 0.33$  for the time of infection, and  $\delta = 0.01$  for the clock  
176 rate. In preliminary runs, we found that these settings were sufficient for replicate chain samples to  
177 converge to the same posterior distribution. To sample integration dates for each DNA sequence,  
178 we further thinned the chain down to a total of 200 samples from the posterior distribution.

179 To compare our results against conventional root-to-tip regression, we censored the sampling  
180 times associated with tips that represented DNA sequences, and then rooted the tree using the *rtt*  
181 function in the R package *ape* (implementation by R. M. McCloskey; Paradis and Schliep, 2019).  
182 We extracted the root-to-tip distances from the resulting tree, and fit a simple linear regression  
183 of these distances against sampling times. Finally, we used the *inverse.predict* function from R  
184 package *chemCal* to extract predicted integration dates for the 200 samples from the posterior  
185 distribution.

186 To quantify the discordance between estimated ( $\hat{t}$ ) and actual ( $t$ ) integration dates, we calculated  
187 the root mean square error,  $\text{RMSE} = \sqrt{\sum_{i=1}^n (\hat{t}_i - t_i)^2 / n}$ , where  $n$  is the number of DNA sequences.  
188 We used a paired Wilcoxon rank-sum test to evaluate the significance of differences between the  
189 RMSEs obtained from *bayroot* and conventional RTT.

### 190 **3. Results**

191 To compare conventional root-to-tip regression (RTT) to our Bayesian approach (*bayroot*), we  
192 simulated the proliferation of HIV-1 among active and latent CD4+ T cells with an exact stochastic  
193 method. Our simulation workflow yielded a total of 100 trees reconstructed from HIV-1 RNA  
194 and DNA sequences. We assumed that HIV-1 RNA was sampled before the start of antiretroviral  
195 therapy (ART), and that HIV-1 proviral DNA was sampled from the latent reservoir in the post-

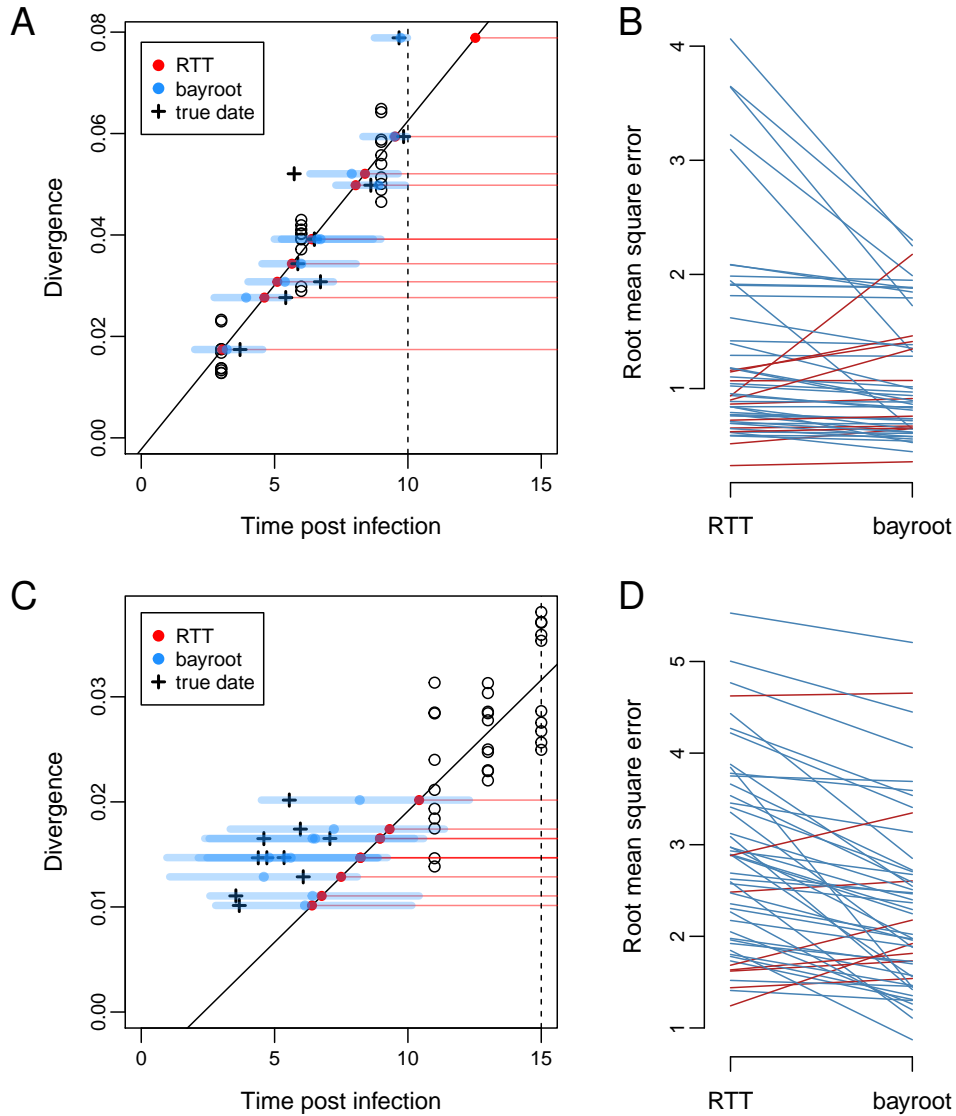

Figure 3: Comparison of results from *bayroot* and conventional root-to-tip (RTT) regression. (A) A scatterplot of root-to-tip distance (divergence) against sampling times post infection, for a representative example generated under scenario 1. A solid line represents the RTT regression fitted to the RNA sequence data (open circles), which we expect to intercept the horizontal axis at  $t = 0$ . A vertical dashed line marks the start of ART. Red points represent estimates of integration dates from the RTT model for DNA sequences sampled at time  $t = 20$ , as indicated by horizontal red lines. Blue points and line segments represent the median and 95% credible interval for integration date estimates from *bayroot*. Cross marks indicate the actual integration dates. (B) A slopegraph comparing the root mean square error (RMSE) of integration date estimates from RTT and *bayroot* for all 50 simulations generated under scenario 1. Line segments are coloured red if the RMSE for a given simulation was greater for *bayroot*, and blue otherwise. (C) and (D) A scatterplot and slopegraph for simulations generated under scenario 2. Slopegraphs was generated using R package *ggfree* (<https://github.com/ArtPoon/ggfree>).

196 ART period (Figure 2). 50 of the trees were simulated such that HIV-1 RNA was sampled at three  
197 time points starting at 3 time units post-infection, at intervals of three time units (scenario 1). For  
198 the remaining 50 trees, HIV-1 RNA sampling was delayed to 11 time units post-infection and taken  
199 at narrower intervals of two time units (scenario 2).

200 Figure 3 compares the estimates of HIV-1 DNA integration dates produced by RTT and (*bay-*  
201 *root*). Under scenario 1, both methods tended to produce similar estimates because the sampling  
202 conditions were favourable for fitting the molecular clock (Figure 3A). The median RMSE was  
203 0.947 for RTT and 0.889 time units for *bayroot*. On a case-by-case basis, *bayroot* produced signif-  
204 icantly more accurate estimates than RTT (paired Wilcoxon test,  $P = 3.55 \times 10^{-4}$ , Figure 3B). The  
205 overall difference between estimates was numerically small. For instance, the median difference  
206 in RMSE between RTT and *bayroot* was 0.059 (interquartile range, IQR = 0.004 – 0.201) time  
207 units. In some cases, however, integration dates were mapped by RTT to the time period after ART  
208 initiation, leading to higher RMSE values (Figure 3B). Since *bayroot* incorporates the prior infor-  
209 mation that HIV-1 integration should not occur during effective ART, its estimates are constrained  
210 to times preceding ART initiation. Furthermore, 89.8% of the actual integration dates fell within  
211 the 95% credible intervals generated by *bayroot*.

212 For scenario 2, both methods became less accurate with median RMSEs of 2.79 and 2.10 time  
213 units for RTT and *bayroot*, respectively (Figure 3D). Because the sampling times of the RNA  
214 sequences used to calibrate the molecular clock were closer together and more distant from the  
215 actual time of infection in this scenario (Figure 3C), we are less certain about all three parameters  
216 of the regression, *i.e.*, the location of the root in the tree, the time associated with the root ( $x$ -  
217 intercept), and the clock rate (slope). Under these conditions, *bayroot* benefits from having prior  
218 information about the time of infection. For our simulations where  $t = 0$  is the actual time, we  
219 constrained the time of infection variable to the interval from  $-1$  to 3 simulation time units. (In  
220 practice, one could use a uniform prior bounded by the last seronegative and first seropositive  
221 dates for that individual.) In other words, prior information about the time of infection ‘anchors’  
222 the root-to-tip regression when there are insufficient data to accurately estimate the  $x$ -intercept

223 (Figure 3C). As a result, *bayroot* was significantly more accurate than RTT (paired Wilcoxon  
224 test,  $P = 3.82 \times 10^{-7}$ , Figure 3D). The median difference in RMSE between RTT and *bayroot*  
225 was 0.405 (IQR 0.190 – 0.807) time units — about seven times greater than scenario 1. 89.4%  
226 of actual integration dates fell within the 95% credible intervals from *bayroot*. There was no  
227 significant association in this outcome between scenarios (Fisher’s exact test, odds ratio = 0.5,  
228  $P = 0.34$ ).

229 Running a chain sample for  $2 \times 10^4$  steps in *bayroot* required a median of 47.3 (IQR 45.0-48.8)  
230 seconds in R version 4.2.0 for Linux on a single core of an AMD Ryzen ThreadRipper 1950X  
231 processor.

## 232 4. Discussion

233 The reconstruction of HIV-1 integration dates is a challenging problem. Cells carrying replication-  
234 competent provirus in the latent reservoir comprise a small fraction of resting CD4+ T cells (ap-  
235 proximately 0.01 to 10 per million cells; Crooks et al., 2015; Prodger et al., 2020). Sequences of  
236 plasma HIV-1 RNA or integrated DNA often cover only a portion of the virus genome (Laskey  
237 et al., 2016), making it difficult to resolve their evolutionary relationships. In addition, the devel-  
238 opment of phylogenetic and statistical methods for analyzing these sequence data (Ferreira et al.,  
239 2021) has lagged behind ongoing improvements in molecular techniques (Cho et al., 2022; Sun  
240 et al., 2022). Here we have described a Bayesian extension of a widely-used regression method for  
241 estimating HIV-1 integration dates from sequence variation in the latent reservoir (Brodin et al.,  
242 2016; Brooks et al., 2020; Jones et al., 2018). Our method provides a means of incorporating ad-  
243 ditional data about the infection — *e.g.*, the estimated date of infection, time of ART initiation,  
244 and previous measures of the rate of HIV-1 evolution within hosts — as prior information. Fur-  
245 thermore, adopting a Bayesian approach enables us to quantify our uncertainty about parameter  
246 estimates by sampling from the posterior distribution. We expect this will be important for stud-  
247 ies where there is limited access to longitudinal plasma samples for retrospective sequencing, for  
248 instance.

249 Of course, our method also retains some significant limitations of conventional approaches to  
250 root-to-tip regression. First, we are assuming that the unrooted phylogeny relating HIV-1 RNA  
251 and DNA sequences is known without error. It is possible to relax this assumption by adopting  
252 a hierarchical approach and replicating our regression analysis on a posterior sample of unrooted  
253 trees that may be generated by a Bayesian phylogenetic program such as MrBayes (Ronquist and  
254 Huelsenbeck, 2003) or BEAST (Drummond and Rambaut, 2007). This is less efficient than sam-  
255 pling from the joint posterior distribution of unrooted trees, substitution model, and the RTT re-  
256 gression parameters. Additionally, we are assuming that the divergence of each sequence is an  
257 independent outcome. This convenient approximation is clearly untrue because of identity by de-  
258 scent: sequences that share a more recent common ancestor will have a similar root-to-tip distance  
259 because they have inherited the same set of mutations. It is possible to overcome this limitation  
260 by adapting the covariance matrix of the regression model to the phylogenetic structure of the data  
261 (Neher, 2018).

262 Not all studies use root-to-tip regression to estimate HIV-1 integration dates. For example,  
263 one of the methods described by Abrahams et al. (2019) uses approximate maximum likelihood to  
264 reconstruct a host-specific phylogeny relating HIV-1 RNA and DNA sequences, and then locates  
265 the closest tip representing an RNA sequence for every tip representing a DNA sequence, which  
266 is assigned the sampling time of the RNA tip. Hence, the DNA sequences can only be associated  
267 with a finite number of integration dates. This approach benefits from extensive sampling of HIV-1  
268 plasma RNA over the time period spanning the start of infection to ART initiation. If the ancestral  
269 HIV-1 RNA sequence most closely related to an HIV-1 provirus is not represented in the tree, then  
270 the latter would be mapped to another branch that may be associated with a sampling time that  
271 does not accurately estimate of the integration date. In contrast, RTT methods directly use the  
272 number of mutations carried by an individual DNA sequence to estimate its integration date. The  
273 other sequences are used to calibrate the linear model mapping this divergence to the timeline.

## 274 5. Data availability

275 *bayroot* is publicly available under the MIT license at <https://github.com/PoonLab/bayroot>. We  
276 have also provided the simulated data and R scripts used to perform the method validation and  
277 generate figures in this repository.

## 278 References

- 279 Melissa-Rose Abrahams, Sarah B Joseph, Nigel Garrett, Lynn Tyers, Matthew Moeser, Nancie  
280 Archin, Olivia D Council, David Matten, Shuntai Zhou, Deelan Doolabh, et al. The replication-  
281 competent HIV-1 latent reservoir is primarily established near the time of therapy initiation.  
282 *Science Translational Medicine*, 11(513):eaaw5589, 2019.
- 283 Samuel Alizon and Christophe Fraser. Within-host and between-host evolutionary rates across the  
284 HIV-1 genome. *Retrovirology*, 10(1):1–10, 2013.
- 285 Johanna Brodin, Fabio Zanini, Lina Thebo, Christa Lanz, Göran Bratt, Richard A Neher, and Jan  
286 Albert. Establishment and stability of the latent HIV-1 DNA reservoir. *eLife*, 5:e18889, 2016.
- 287 Lindell Bromham and David Penny. The modern molecular clock. *Nature Reviews Genetics*, 4(3):  
288 216–224, 2003.
- 289 Kelsie Brooks, Bradley R Jones, Dario A Dilernia, Daniel J Wilkins, Daniel T Claiborne, Samantha  
290 McNally, Jill Gilmour, William Kilembe, Jeffrey B Joy, Susan A Allen, et al. HIV-1 variants  
291 are archived throughout infection and persist in the reservoir. *PLoS Pathogens*, 16(6):e1008378,  
292 2020.
- 293 Alice Cho, Christian Gaebler, Thiago Oliveira, Victor Ramos, Marwa Saad, Julio CC Lorenzi, Anna  
294 Gazumyan, Susan Moir, Marina Caskey, Tae-Wook Chun, et al. Longitudinal clonal dynamics  
295 of HIV-1 latent reservoirs measured by combination quadruplex polymerase chain reaction and  
296 sequencing. *Proceedings of the National Academy of Sciences*, 119(4):e2117630119, 2022.

- 297 Amanda M Crooks, Rosalie Bateson, Anna B Cope, Noelle P Dahl, Morgan K Griggs, JoAnn D  
298 Kuruc, Cynthia L Gay, Joseph J Eron, David M Margolis, Ronald J Bosch, et al. Precise quanti-  
299 tation of the latent HIV-1 reservoir: implications for eradication strategies. *Journal of Infectious*  
300 *Diseases*, 212(9):1361–1365, 2015.
- 301 Alexei Drummond, Oliver G Pybus, and Andrew Rambaut. Inference of viral evolutionary rates  
302 from molecular sequences. *Adv Parasitol*, 54:331–358, 2003.
- 303 Alexei J Drummond and Andrew Rambaut. BEAST: Bayesian evolutionary analysis by sampling  
304 trees. *BMC Evolutionary Biology*, 7(1):1–8, 2007.
- 305 Sebastian Duchene, Leo Featherstone, Melina Haritopoulou-Sinanidou, Andrew Rambaut,  
306 Philippe Lemey, and Guy Baele. Temporal signal and the phylodynamic threshold of SARS-  
307 CoV-2. *Virus Evolution*, 6(2):veaa061, 2020.
- 308 Roux-Cil Ferreira, Jessica L Prodger, Andrew D Redd, and Art FY Poon. Quantifying the clonality  
309 and dynamics of the within-host HIV-1 latent reservoir. *Virus Evolution*, 7(1):veaa104, 2021.
- 310 William Fletcher and Ziheng Yang. INDELible: a flexible simulator of biological sequence evolu-  
311 tion. *Molecular Biology and Evolution*, 26(8):1879–1888, 2009.
- 312 Daniel T Gillespie. Exact stochastic simulation of coupled chemical reactions. *Journal of Physical*  
313 *Chemistry*, 81(25):2340–2361, 1977.
- 314 Marcos VP Gondim, Scott Sherrill-Mix, Frederic Bibollet-Ruche, Ronnie M Russell, Stephanie  
315 Trimboli, Andrew G Smith, Yingying Li, Weimin Liu, Alexa N Avitto, Julia C DeVoto, et al.  
316 Heightened resistance to host type 1 interferons characterizes HIV-1 at transmission and after  
317 antiretroviral therapy interruption. *Science Translational Medicine*, 13(576):eabd8179, 2021.
- 318 John P Huelsenbeck, Jonathan P Bollback, and Amy M Levine. Inferring the root of a phylogenetic  
319 tree. *Systematic Biology*, 51(1):32–43, 2002.



- 320 Bradley R Jones, Natalie N Kinloch, Joshua Horacsek, Bruce Ganase, Marianne Harris, P Richard  
321 Harrigan, R Brad Jones, Mark A Brockman, Jeffrey B Joy, Art FY Poon, et al. Phylogenetic  
322 approach to recover integration dates of latent HIV sequences within-host. *Proceedings of the*  
323 *National Academy of Sciences*, 115(38):E8958–E8967, 2018.
- 324 Charles H Langley and Walter M Fitch. An examination of the constancy of the rate of molecular  
325 evolution. *Journal of Molecular Evolution*, 3(3):161–177, 1974.
- 326 Sarah B Laskey, Christopher W Pohlmeier, Katherine M Bruner, and Robert F Siliciano. Evaluat-  
327 ing clonal expansion of HIV-infected cells: optimization of PCR strategies to predict clonality.  
328 *PLoS Pathogens*, 12(8):e1005689, 2016.
- 329 Richard A Neher. Efficient estimation of evolutionary rates by covariance aware regression.  
330 *bioRxiv*, page 408005, 2018.
- 331 Emmanuel Paradis and Klaus Schliep. ape 5.0: an environment for modern phylogenetics and  
332 evolutionary analyses in r. *Bioinformatics*, 35(3):526–528, 2019.
- 333 Morgan N Price, Paramvir S Dehal, and Adam P Arkin. FastTree 2—approximately maximum-  
334 likelihood trees for large alignments. *PLoS ONE*, 5(3):e9490, 2010.
- 335 Jessica L Prodger, Adam A Capoferri, Katherine Yu, Jun Lai, Steven J Reynolds, Jingo Kasule,  
336 Taddeo Kityamuweesi, Paul Buule, David Serwadda, Kyungyoon J Kwon, et al. Reduced HIV-1  
337 latent reservoir outgrowth and distinct immune correlates among women in Rakai, Uganda. *JCI*  
338 *Insight*, 5(14), 2020.
- 339 Libin Rong and Alan S Perelson. Modeling latently infected cell activation: viral and latent reser-  
340 voir persistence, and viral blips in HIV-infected patients on potent therapy. *PLoS Computational*  
341 *Biology*, 5(10):e1000533, 2009.
- 342 Fredrik Ronquist and John P Huelsenbeck. MrBayes 3: Bayesian phylogenetic inference under  
343 mixed models. *Bioinformatics*, 19(12):1572–1574, 2003.

- 344 Janet D Siliciano and Robert F Siliciano. A long-term latent reservoir for HIV-1: discovery and  
345 clinical implications. *Journal of Antimicrobial Chemotherapy*, 54(1):6–9, 2004.
- 346 Chen Sun, Leqian Liu, Liliana Pérez, Xiangpeng Li, Yifan Liu, Peng Xu, Eli A Boritz, James I  
347 Mullins, and Adam R Abate. Droplet-microfluidics-assisted sequencing of HIV proviruses and  
348 their integration sites in cells from people on antiretroviral therapy. *Nature Biomedical Engi-*  
349 *neering*, pages 1–9, 2022.
- 350 Fumio Tajima and Masatoshi Nei. Estimation of evolutionary distance between nucleotide se-  
351 quences. *Molecular Biology and Evolution*, 1(3):269–285, 1984.
- 352 Thu-Hien To, Matthieu Jung, Samantha Lycett, and Olivier Gascuel. Fast dating using least-  
353 squares criteria and algorithms. *Systematic Biology*, 65(1):82–97, 2016.
